# Supplementary material
Source: MDPI journal article supplement (https://www.mdpi.com/2306-5729/9/5/65)
Supplement: s1 [file s1]

# Spectral library of plant species from Montesinho Natural Park in Portugal

Isabel Pôças <sup>1,\*</sup>, Cátia Rodrigues de Almeida <sup>2,3,4</sup>, Salvador Arenas-Castro <sup>5</sup>, João C. Campos <sup>6</sup>, Nuno Garcia <sup>6</sup>, João Alírio <sup>2,3</sup>, Neftalí Sillero <sup>6</sup>, Ana C. Teodoro <sup>2,3</sup>

- <sup>1</sup> CoLAB ForestWISE - Collaborative Laboratory for Integrated Forest & Fire Management, Quinta de Prados, Campus da UTAD, 5001-801 Vila Real, Portugal; isabel.pocas@forestwise.pt (Isabel Pôças).
  - <sup>2</sup> Department of Geosciences, Environment and Land Planning, Faculty of Sciences, University of Porto, Rua Campo Alegre, 687, 4169-007 Porto, Portugal; up201600831@fc.up.pt (Cátia Rodrigues de Almeida); amteodor@fc.up.pt (Ana Cláudia Teodoro); joao.m.alirio@gmail.com (João Alírio).
  - <sup>3</sup> Earth Sciences Institute (ICT), Pole of the FCUP, University of Porto, 4169-007 Porto, Portugal.
  - <sup>4</sup> Centro de Investigação de Montanha (CIMO), Instituto Politécnico de Bragança (IPB), Campus de Santa Apolónia, 5300-253 Bragança, Portugal.
  - <sup>5</sup> Area of Ecology – Department of Botany, Ecology and Plant Physiology, Faculty of Sciences (University of Cordoba). Campus de Rabanales. 14014 Córdoba, Spain; b62arcas@uco.es (Salvador Arenas-Castro).
  - <sup>6</sup> CICGE - Centro de Investigação em Ciências GeoEspaciais, Faculdade de Ciências da Universidade do Porto, Alameda do Monte da Virgem, 4430-146 Vila Nova de Gaia, Portugal; jc.campos@fc.up.pt (João C. Campos); nuno.garcia@fc.up.pt (Nuno Garcia); neftali.sillero@gmail.com (Neftalí Sillero).
- \* Correspondence: isabel.pocas@forestwise.pt

**Supplementary Materials:** The following supporting information can be downloaded: Figure S1: Photographic record of a leaf from each vascular plant species selected for spectral data collection. Figure S2: Individual spectral curves, covering the range 350 – 2500 nm, collected per leaf and leaf side in each species. Both sides of the leaves (ventral/front (F) side and dorsal/back (B) side) were considered for *Alnus glutinosa* (L.) Gaertn (AlnGlu), *Arbutus unedo* L. (ArbUne), *Castanea sativa* Mill. (CatSat), *Cistus ladanifer* L. (CistLad), *Crataegus monogyna* Jacq. (CratMon), *Frangula alnus* Mill. (FranAln), *Fraxinus angustifolia* Vahl (FraxAng), *Quercus pyrenaica* Willd. (QuerPyr), *Quercus rotundifolia* Lam. (QuerRot), and *Trifolium repens* L. (TrifRep), while a single side of the leaves was considered for *Acacia dealbata* Link. (AcaDea), *Cytisus multiflorus* (L'Hér.) Sweet (CytMult), *Dactylis glomerata* L. (DactGlo), *Erica arborea* L. (EriArb), and *Genista falcata* Brot. (GenFal). Table S1 - Coordinates (WGS 84) of the centre of the square grids sampled at Montesinho National Park.

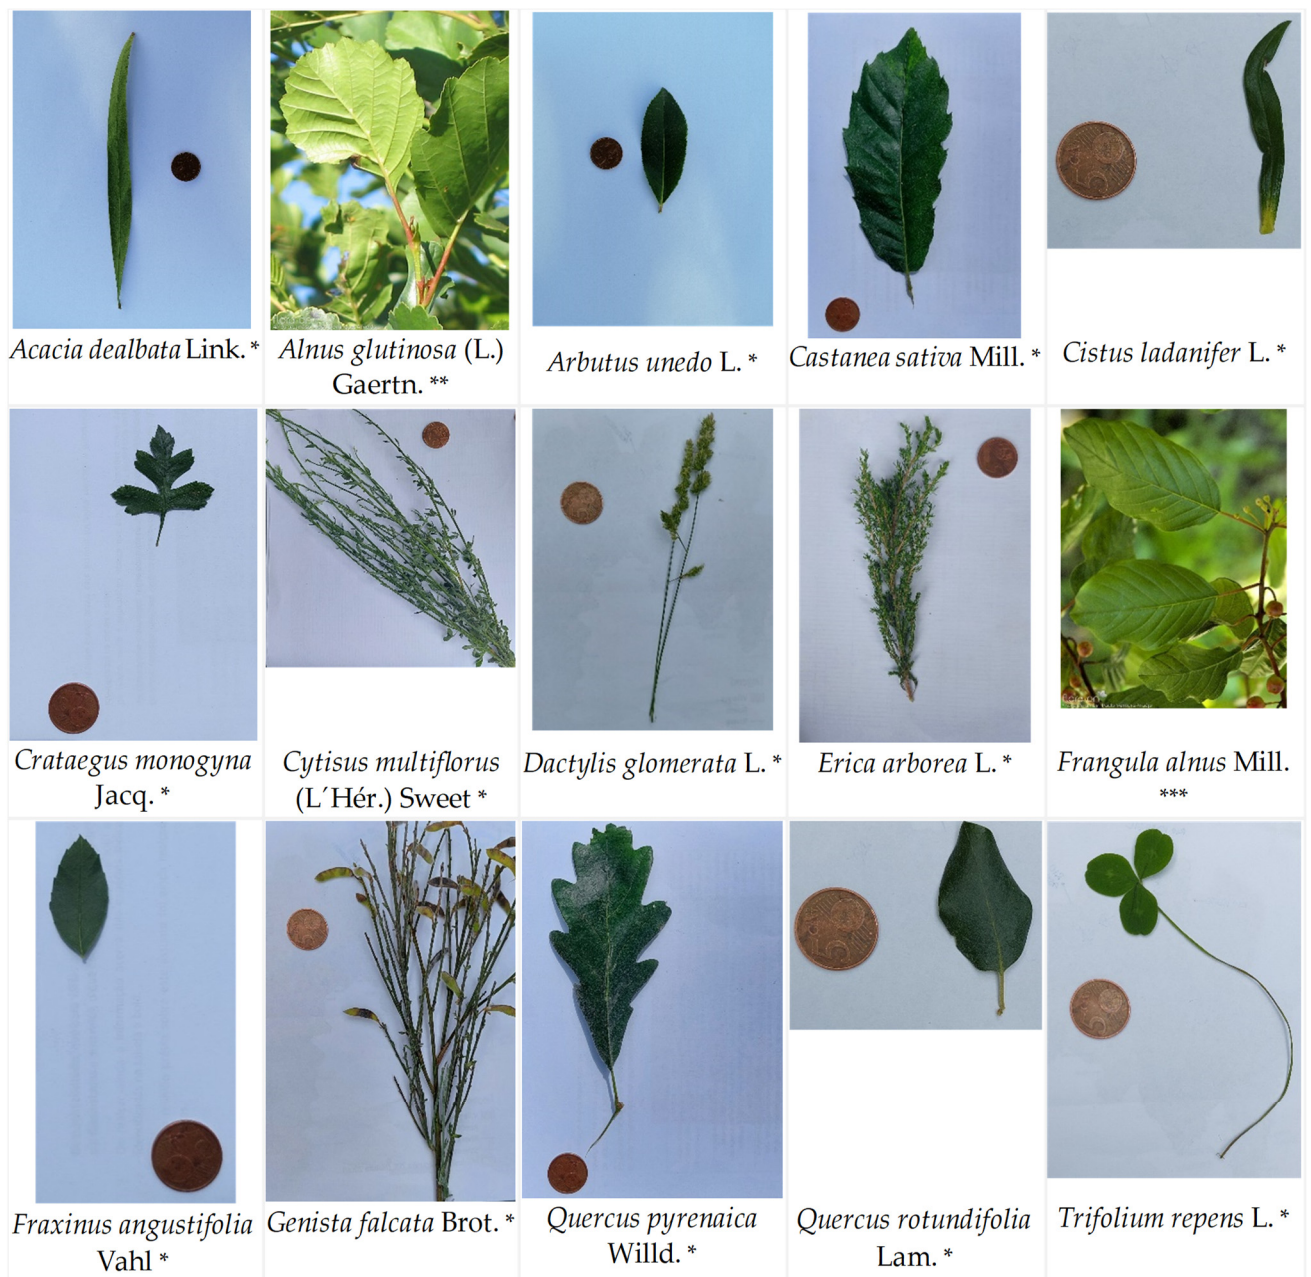

\* Photo credits: Campos, J. C. (2024). \*\* Almeida, J. D. (n.d.). Flora-On. License: CC BY-NC 4.0. \*\*\* Araújo, P. V. (n.d.). Flora-On. License: CC BY-NC 4.0.

**Figure S1** – Photographic record of a leaf from each vascular plant species selected for spectral data collection.

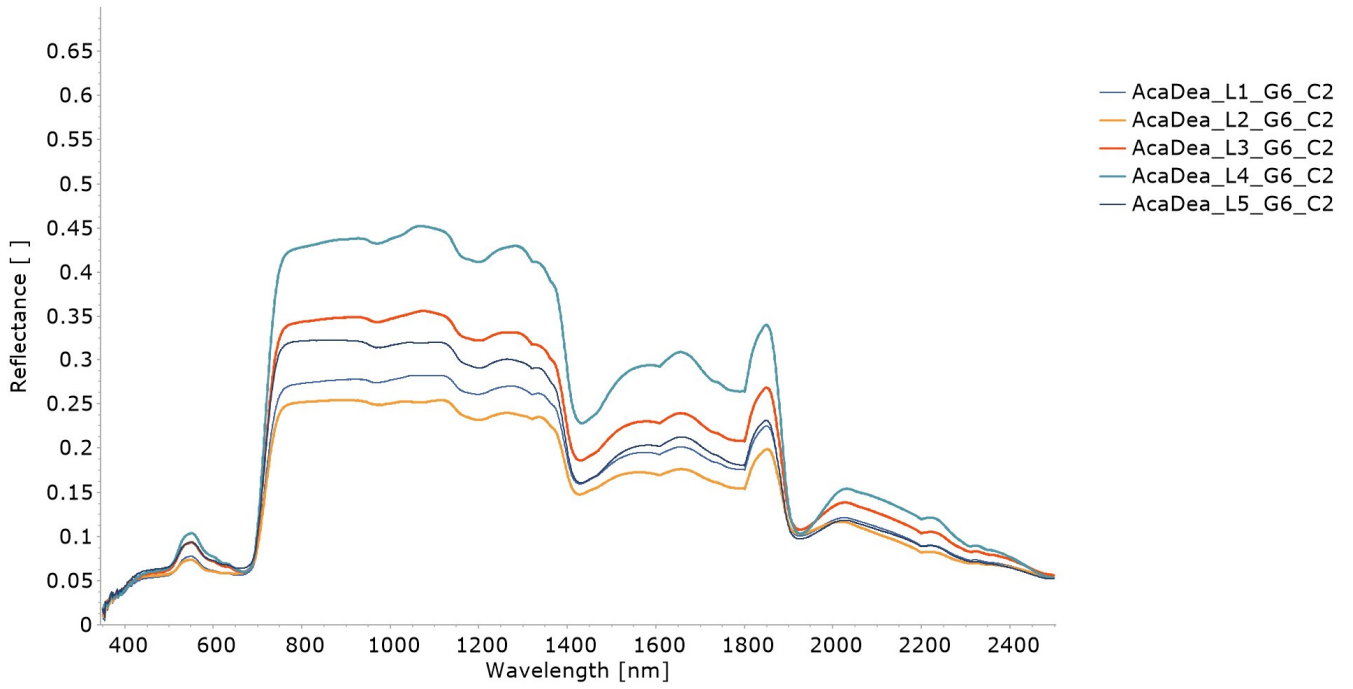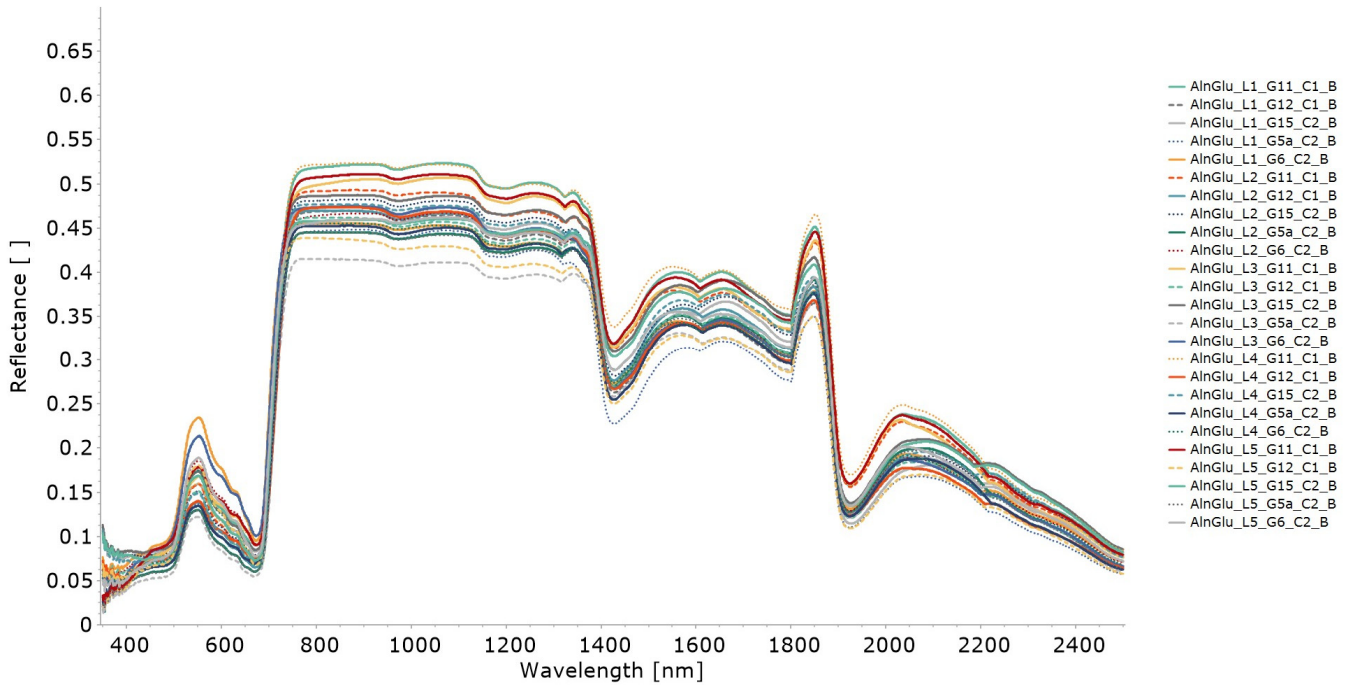

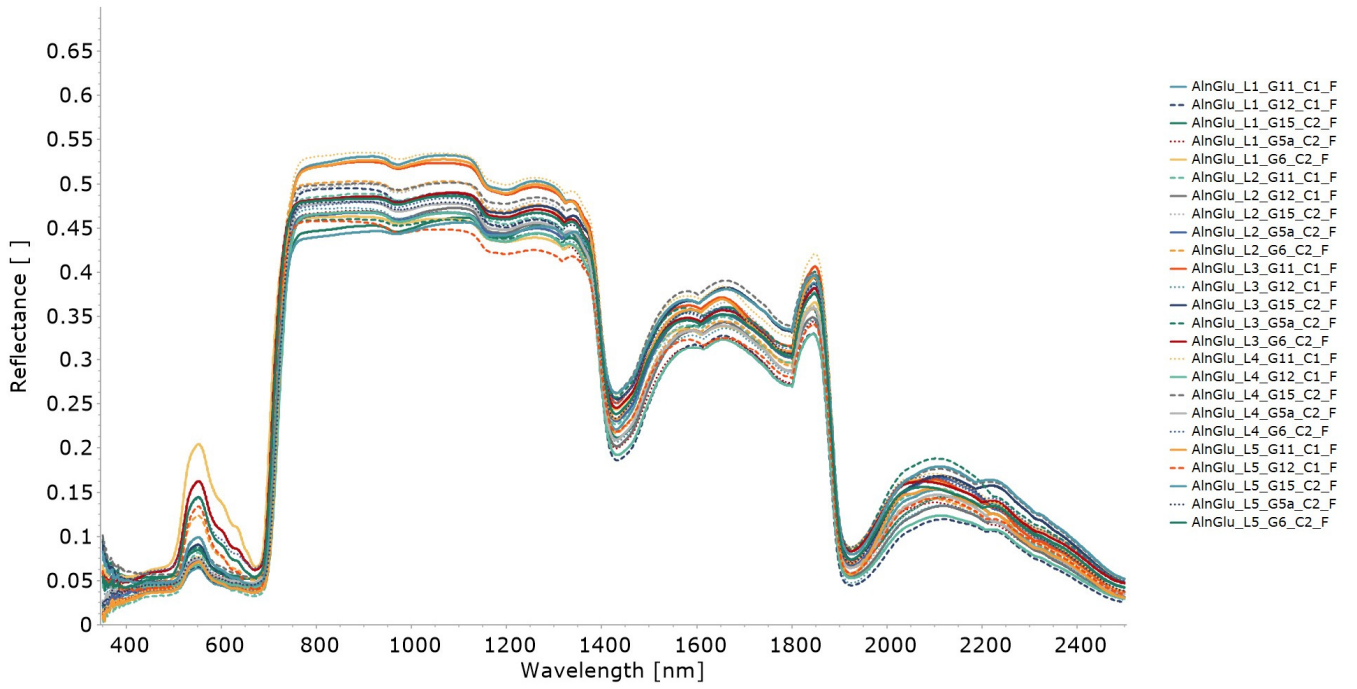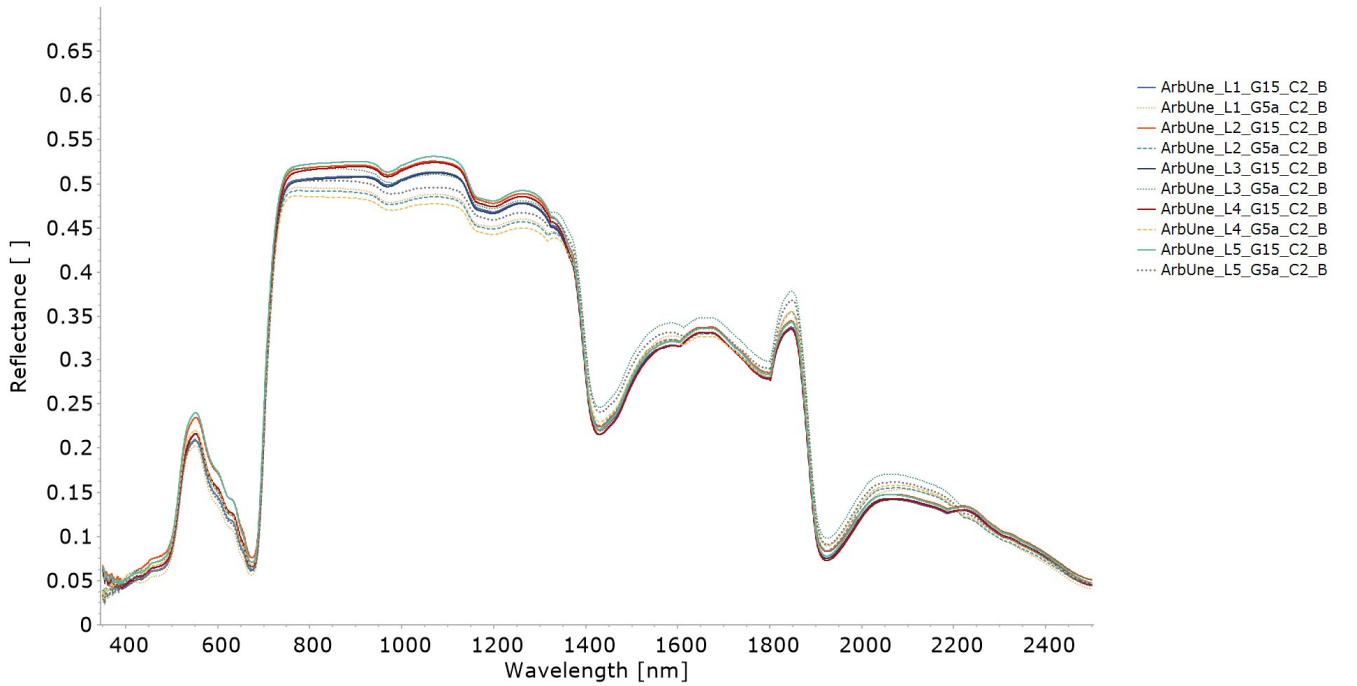



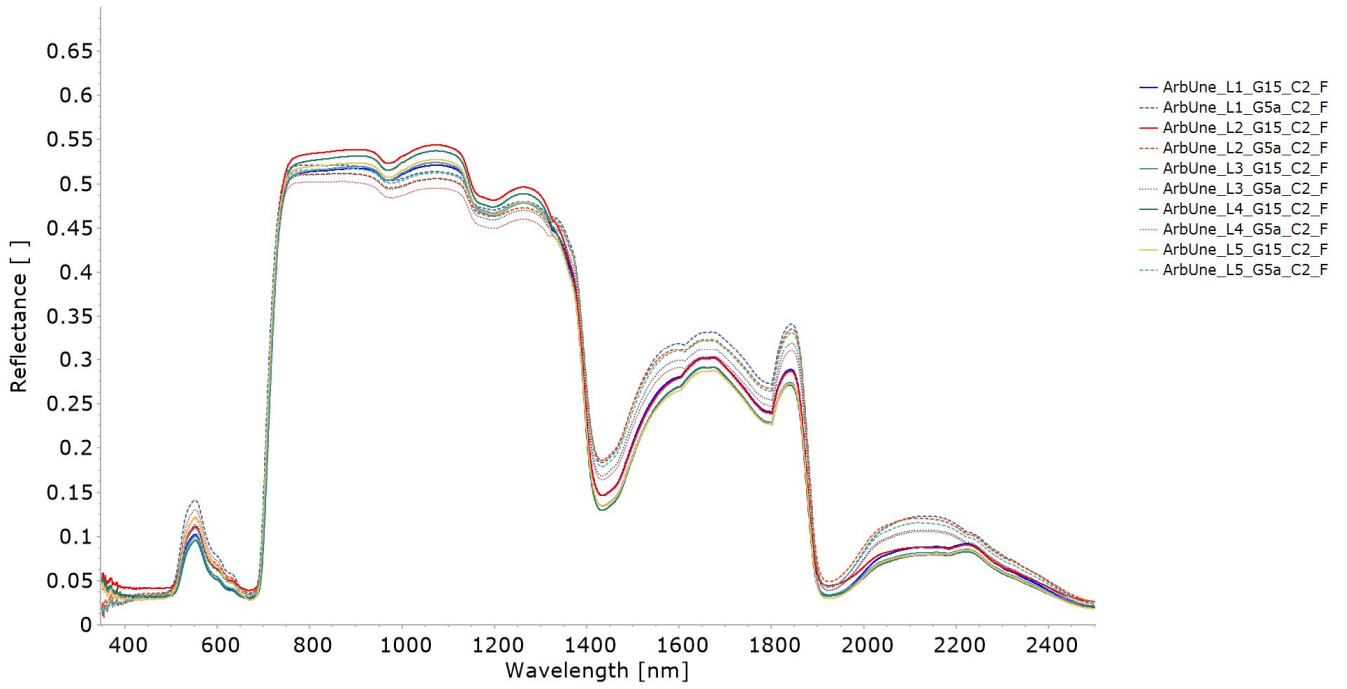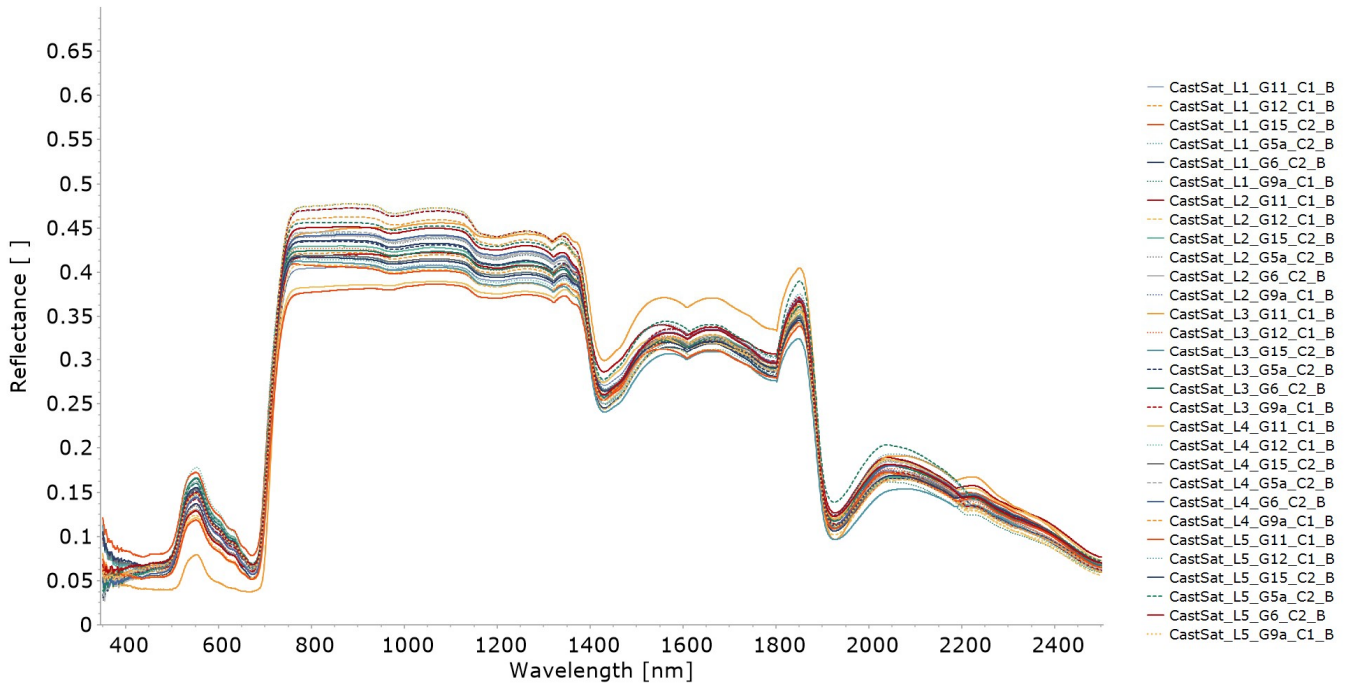

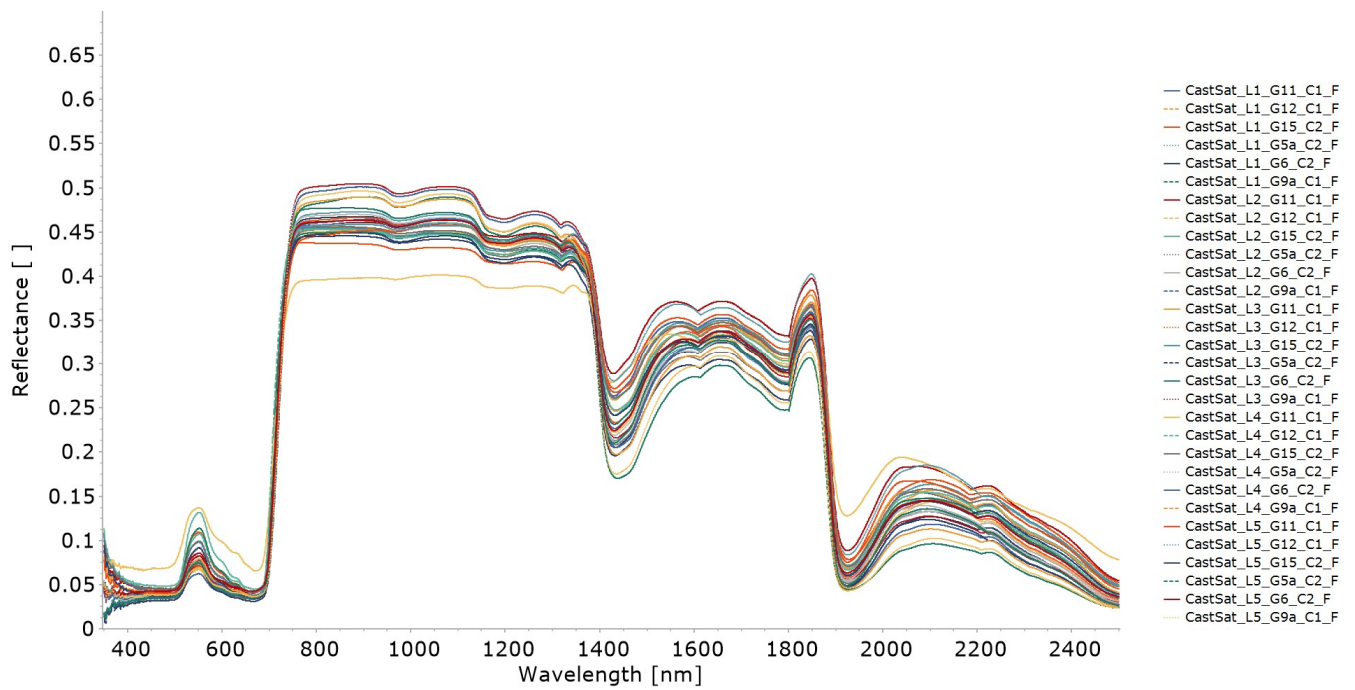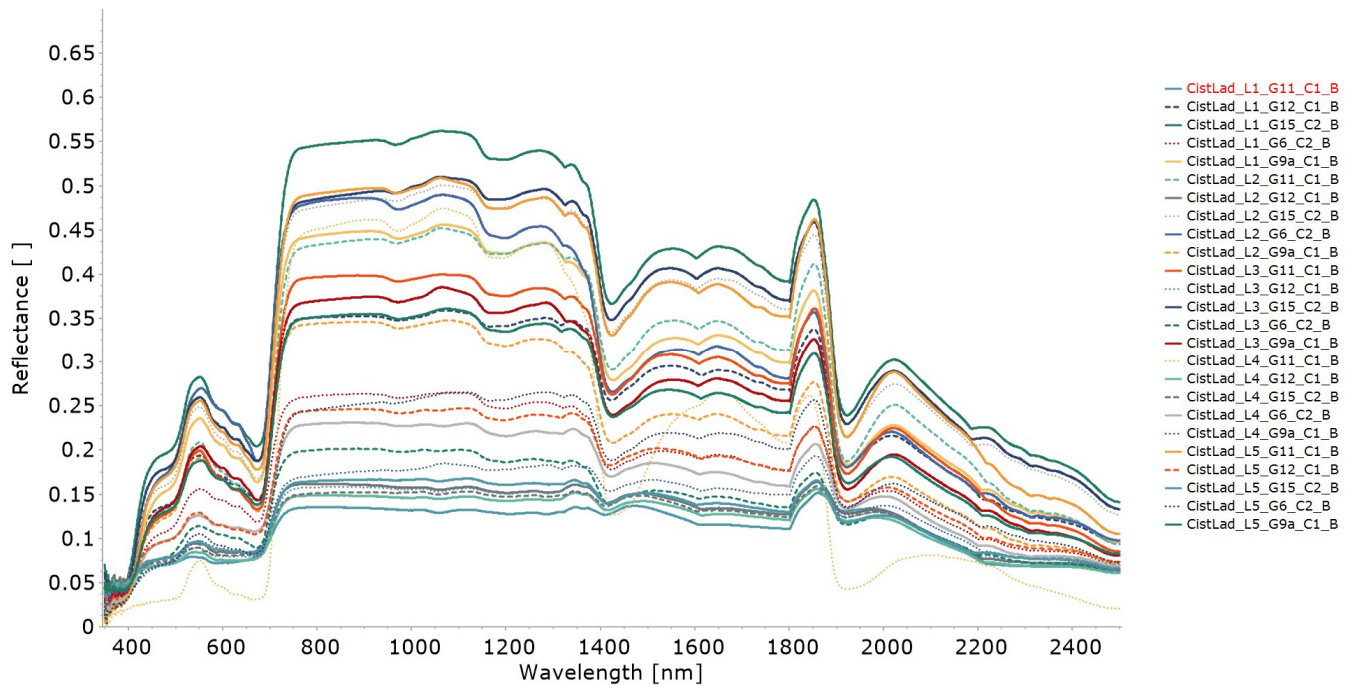

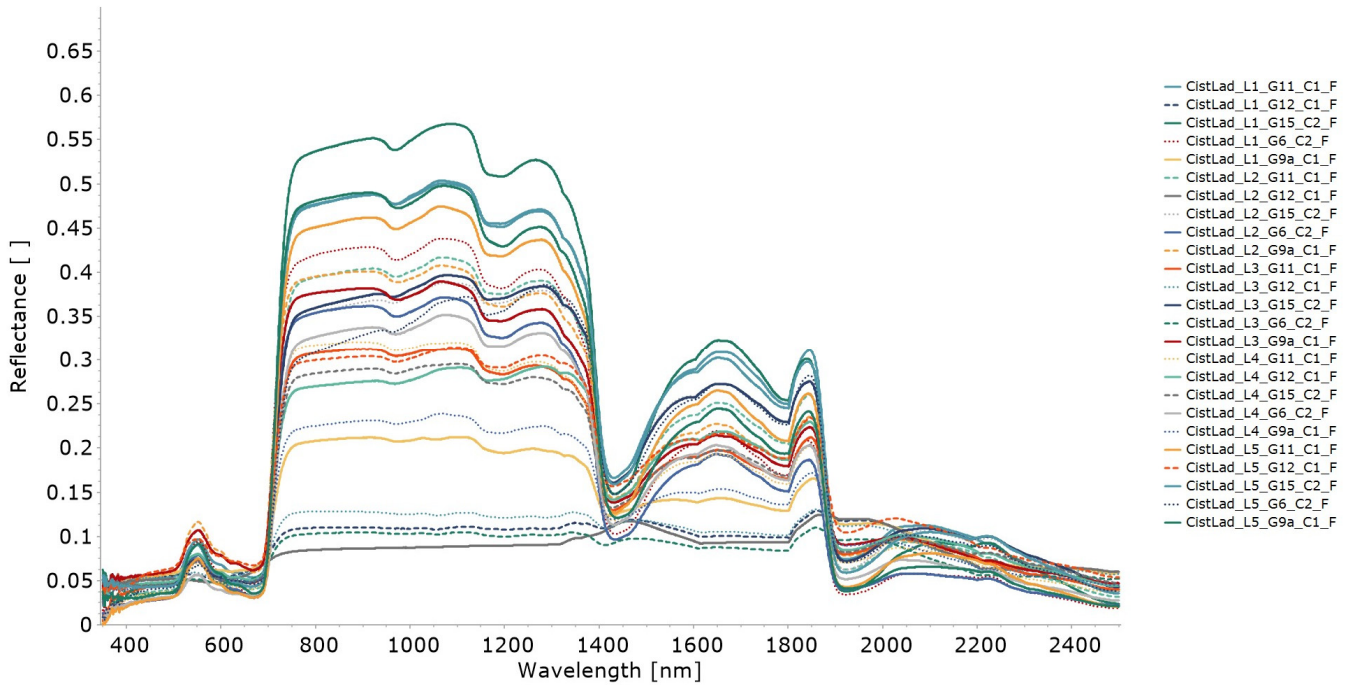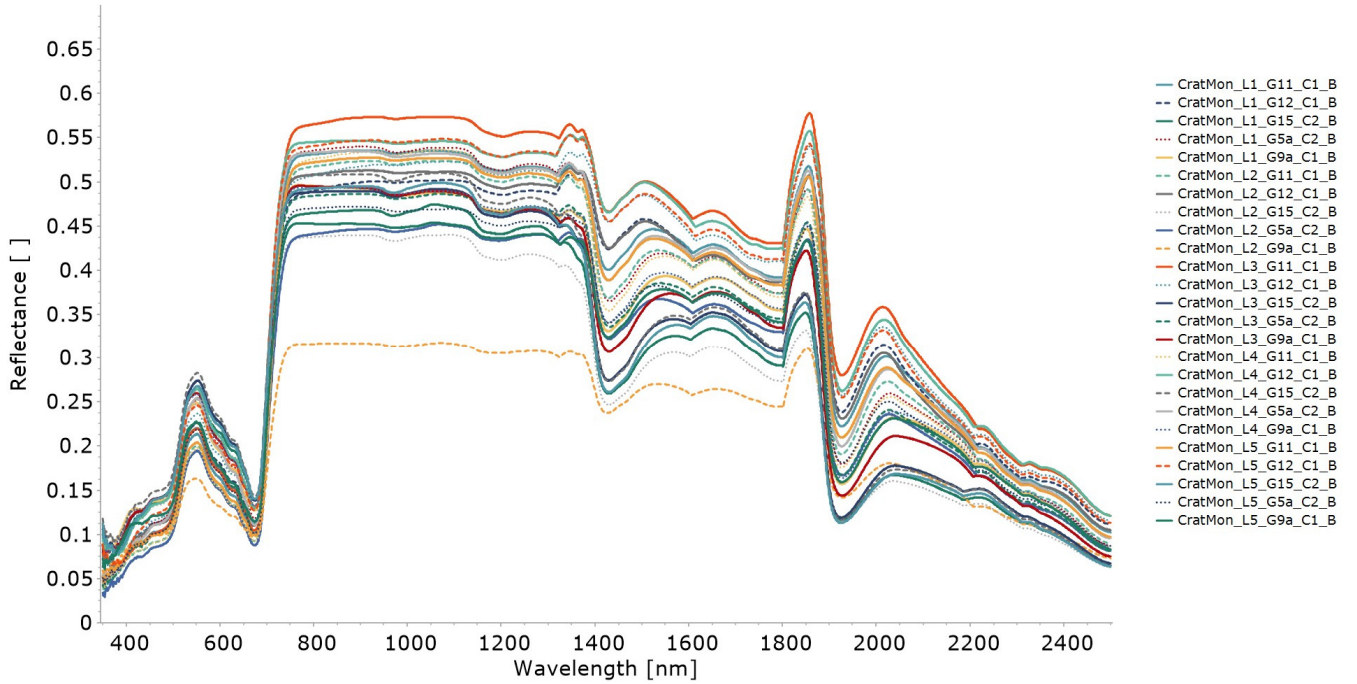

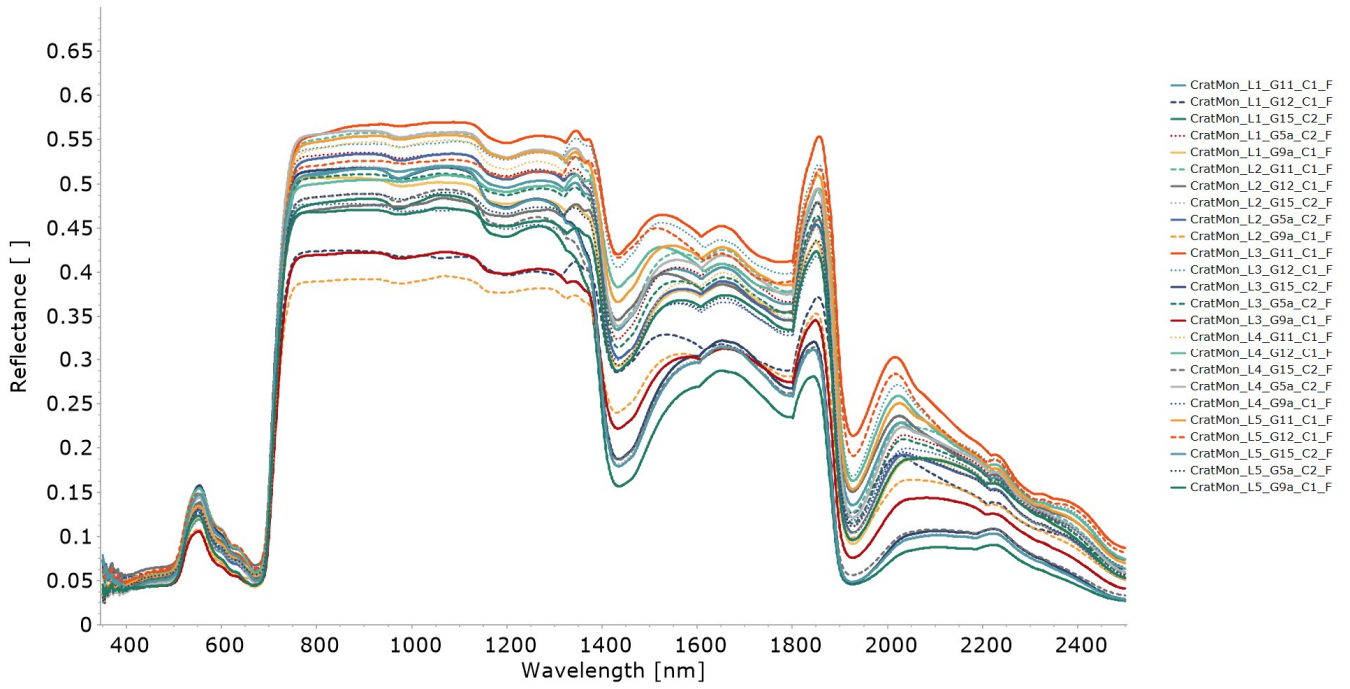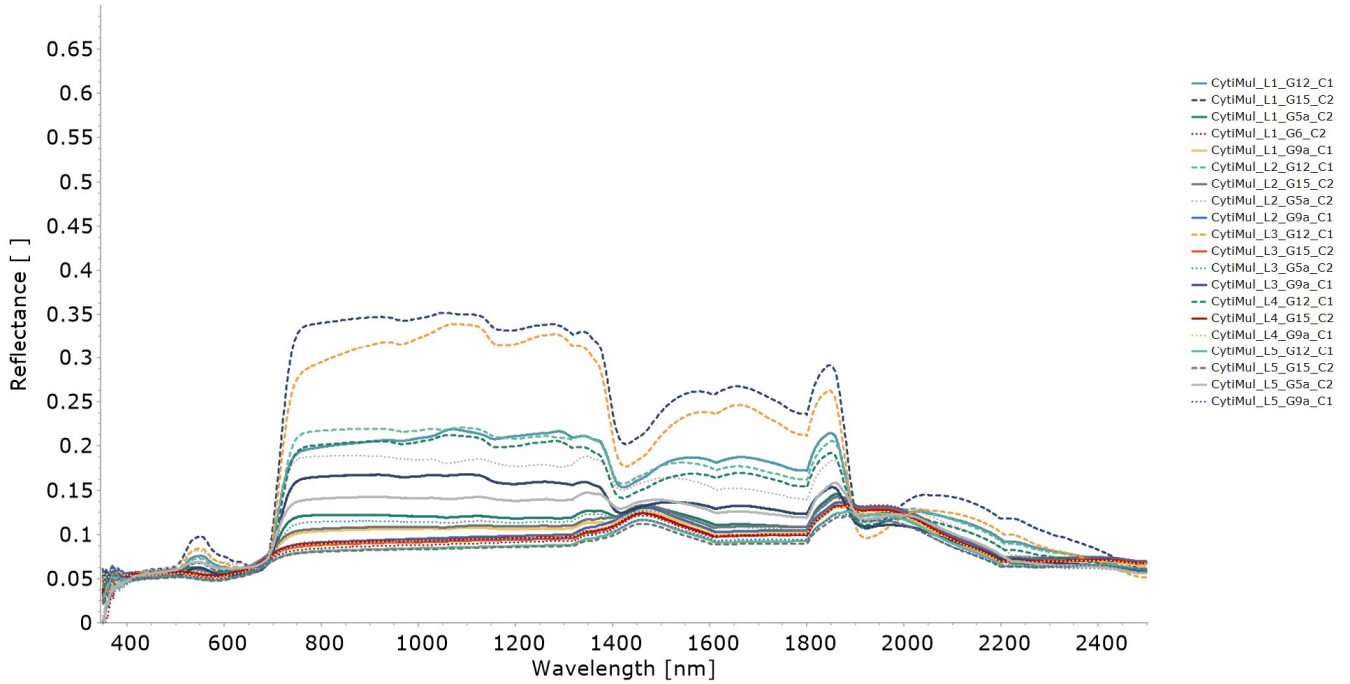



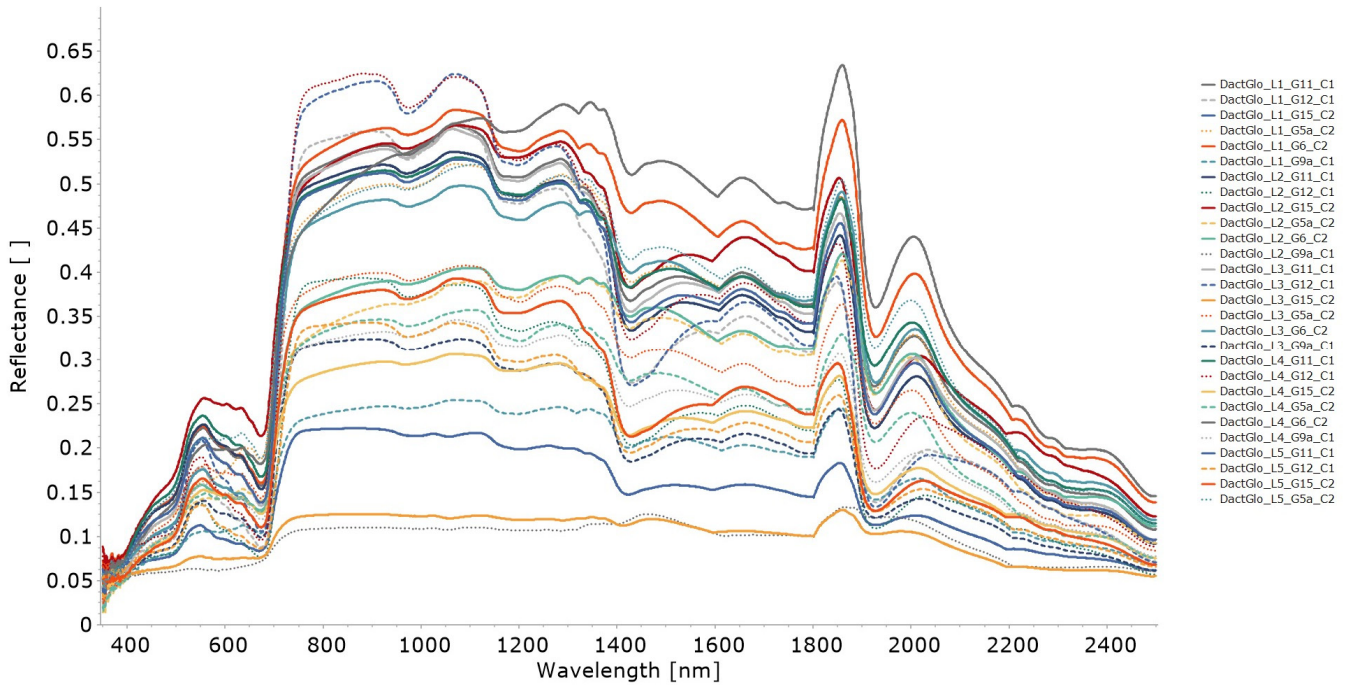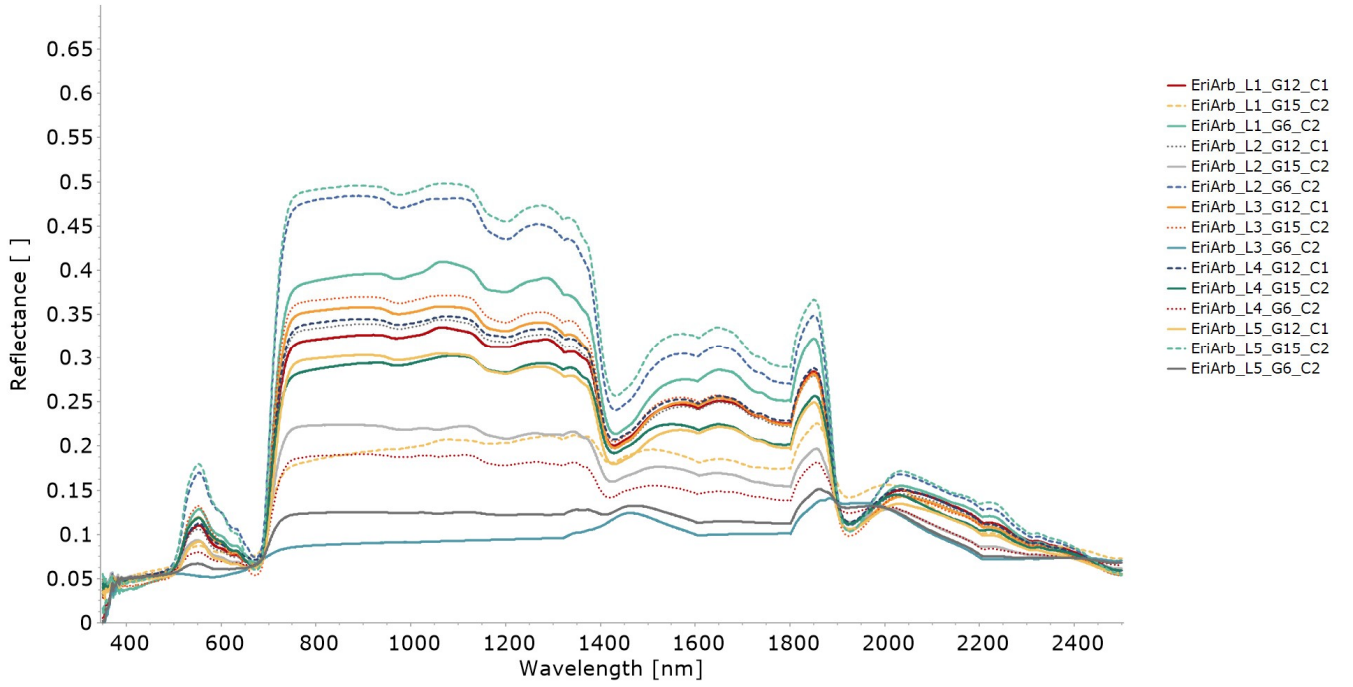

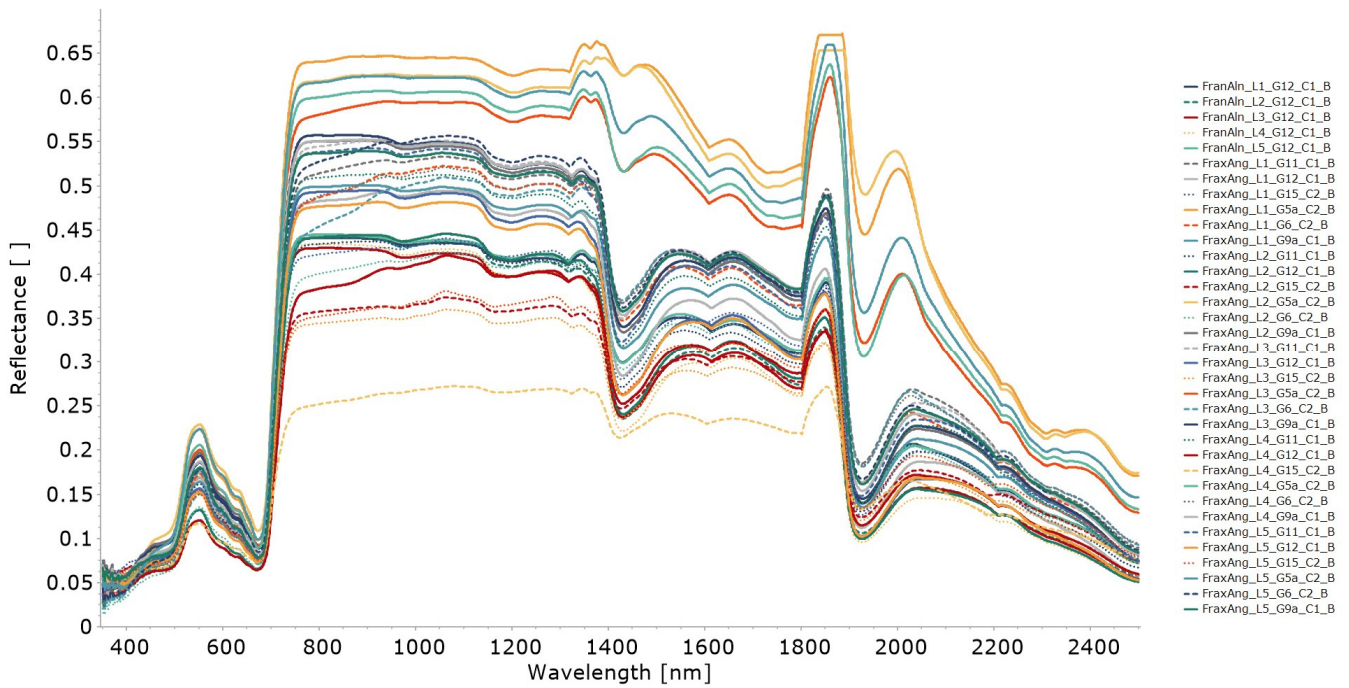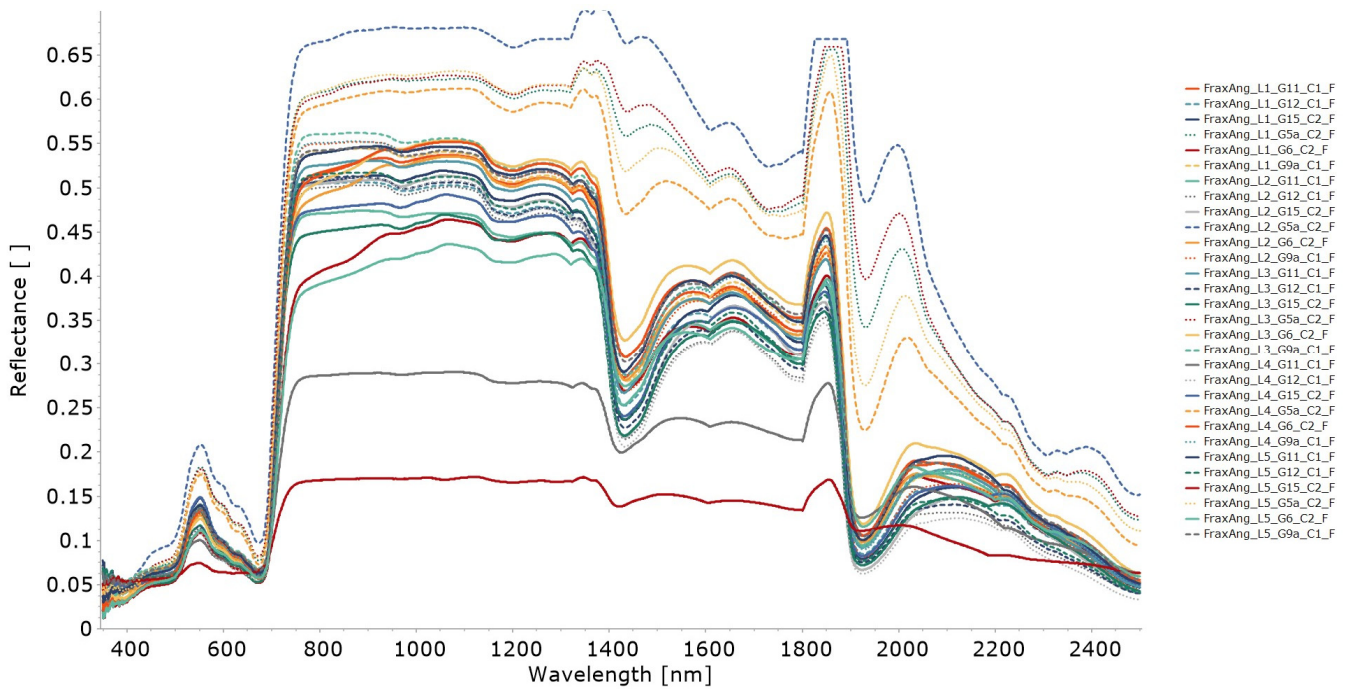

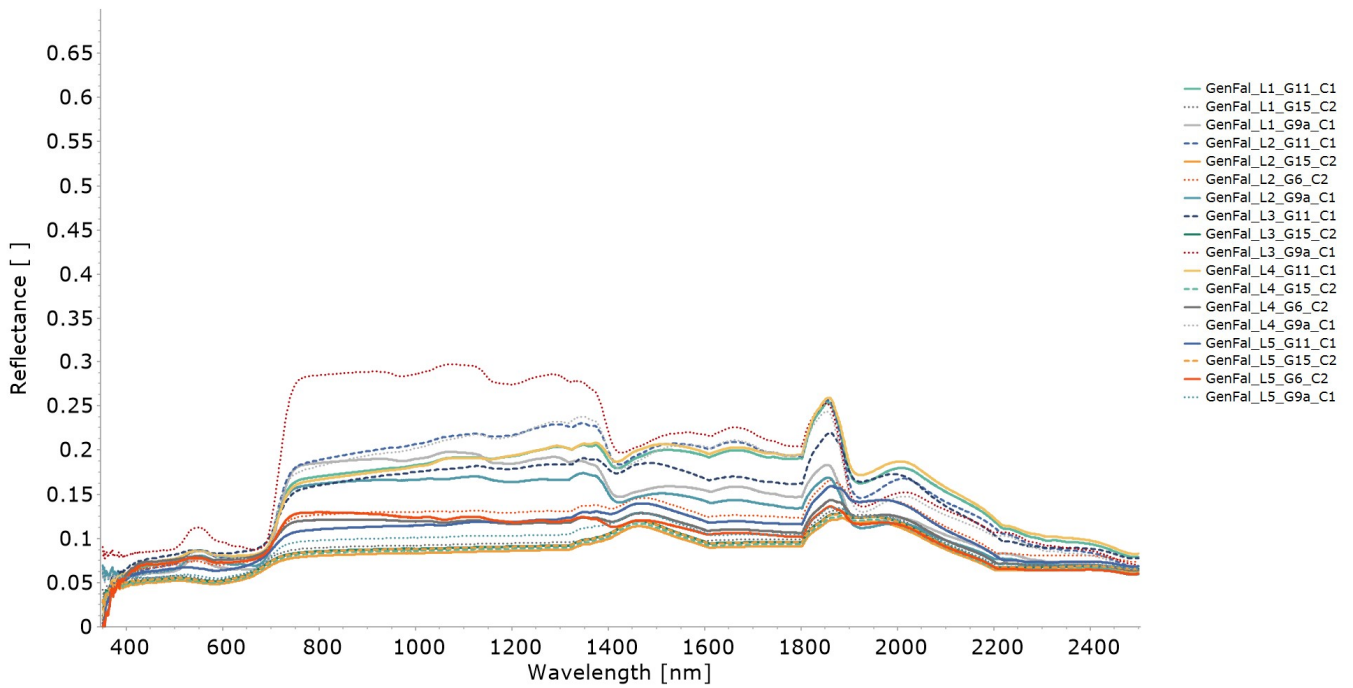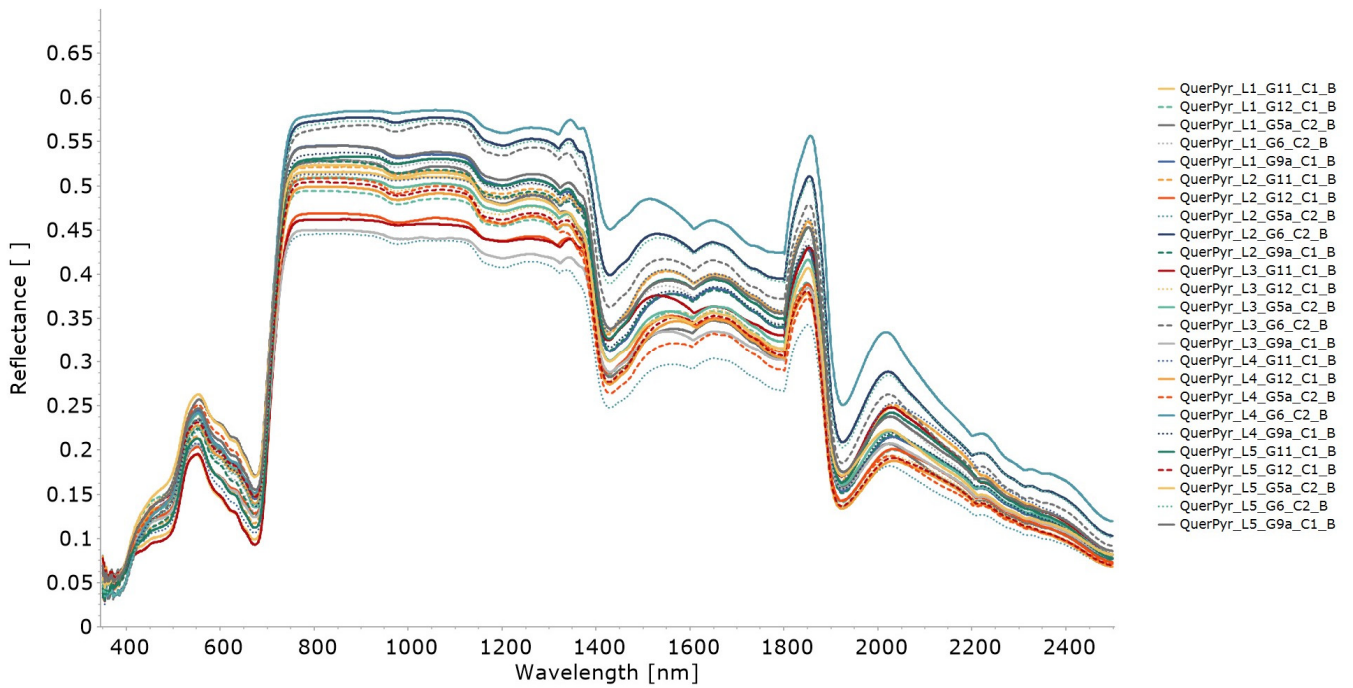



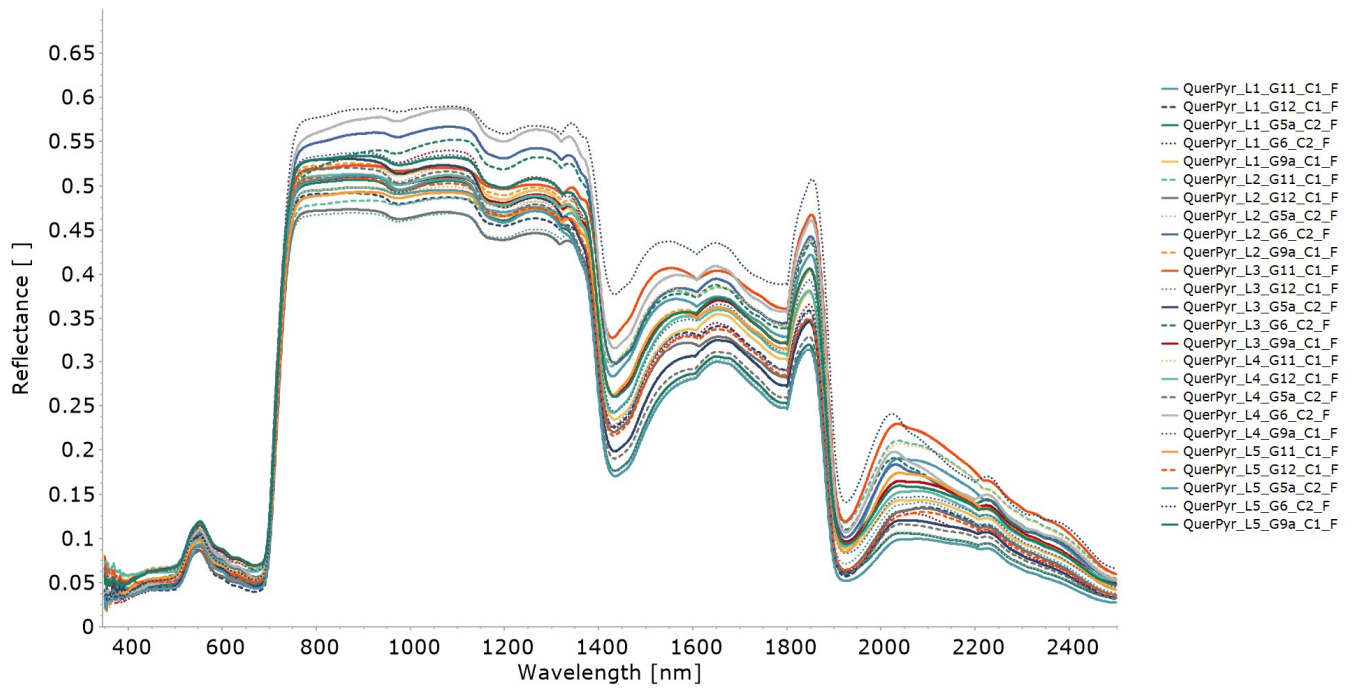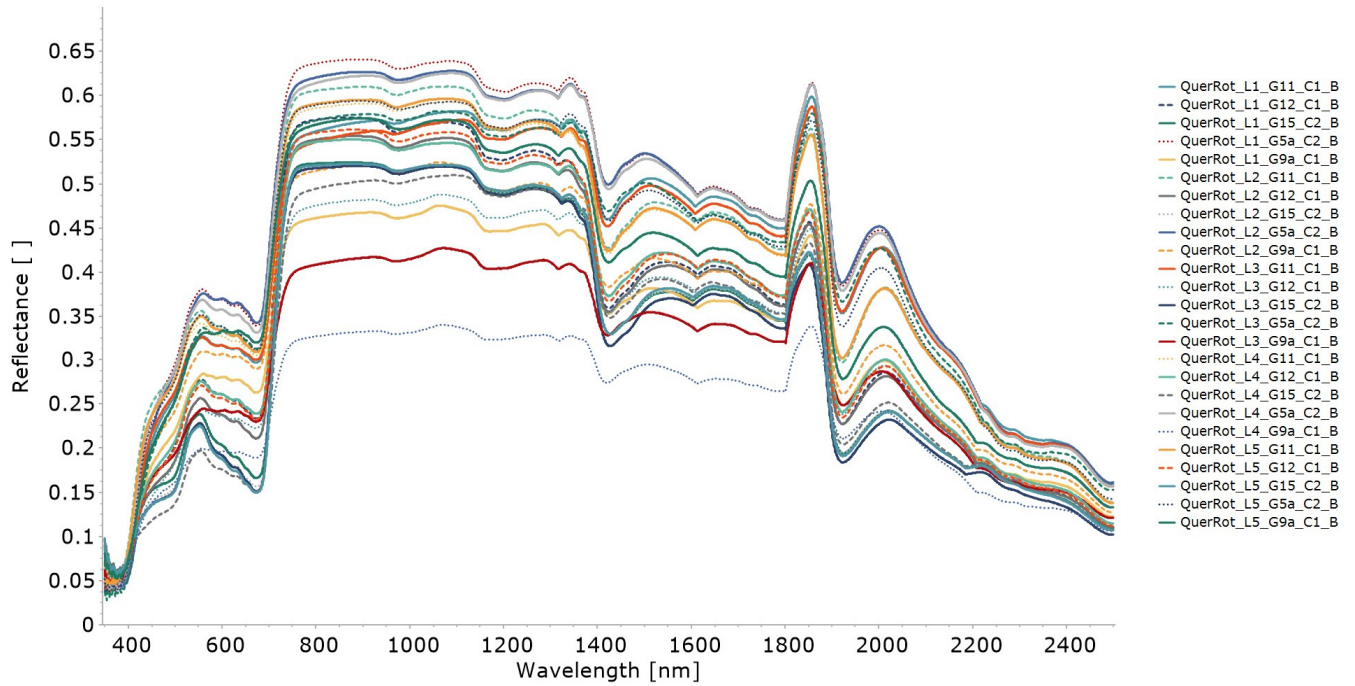



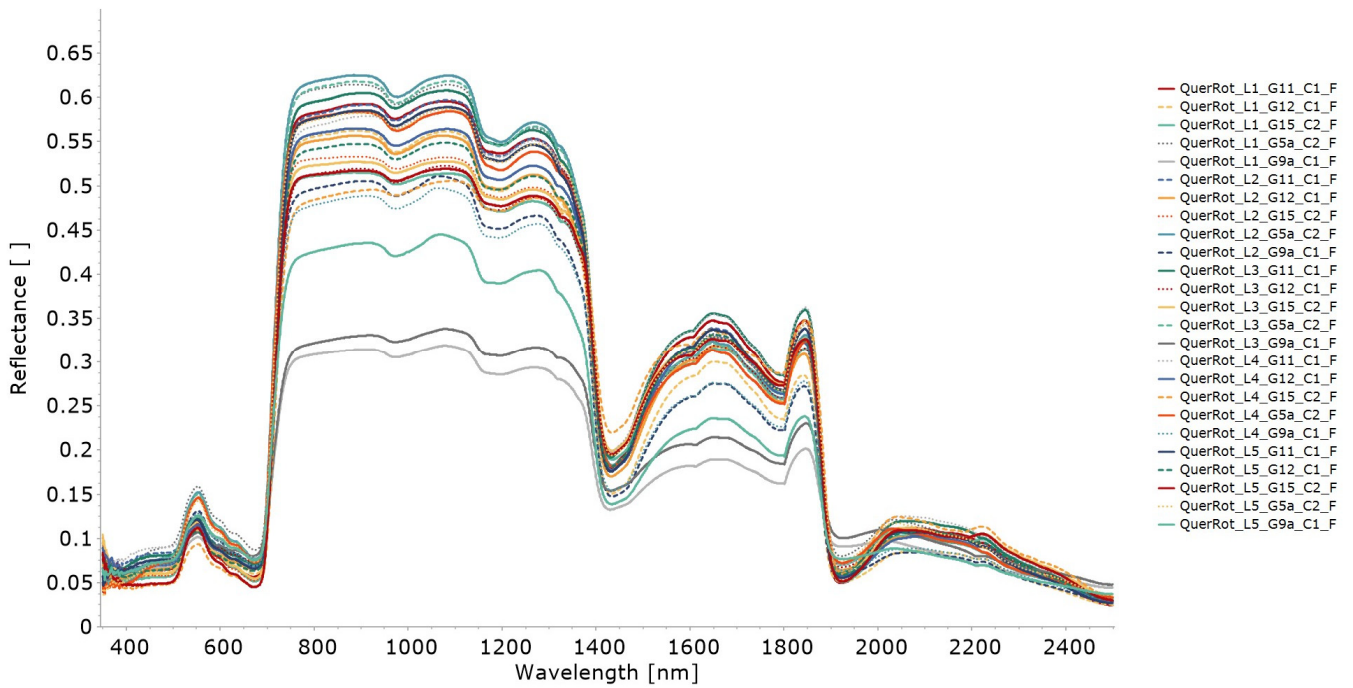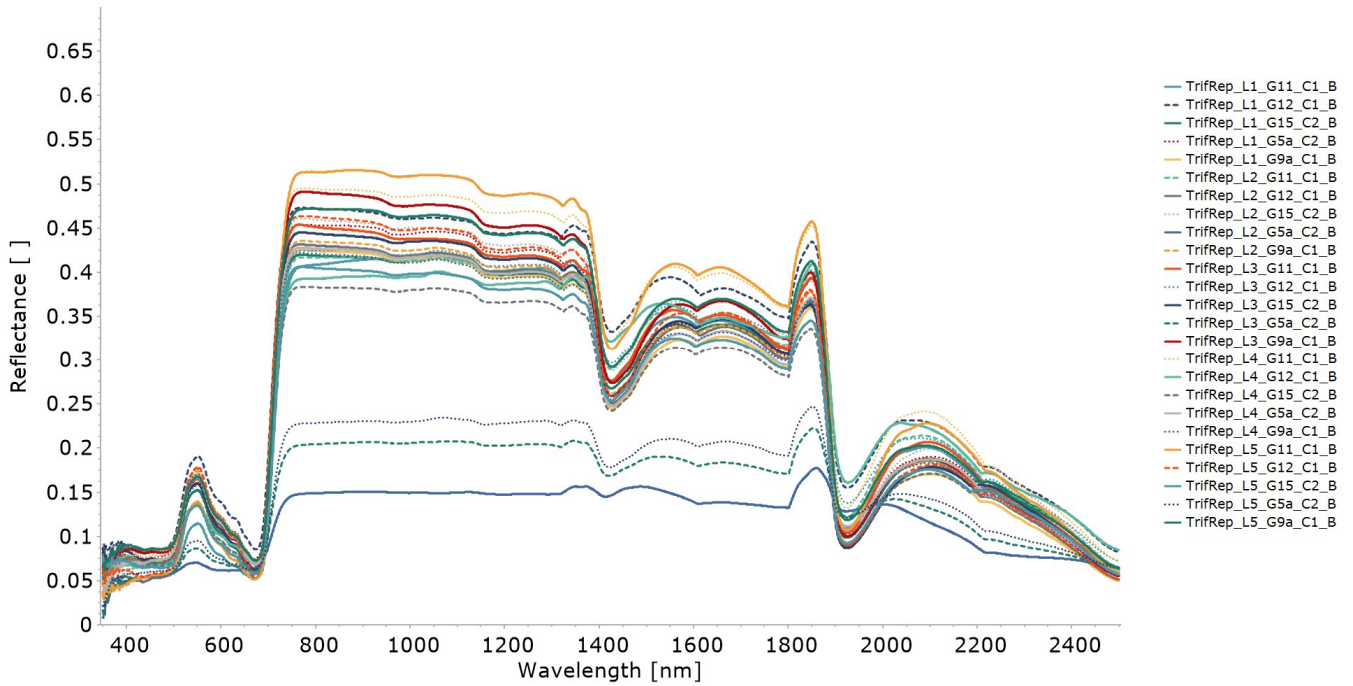

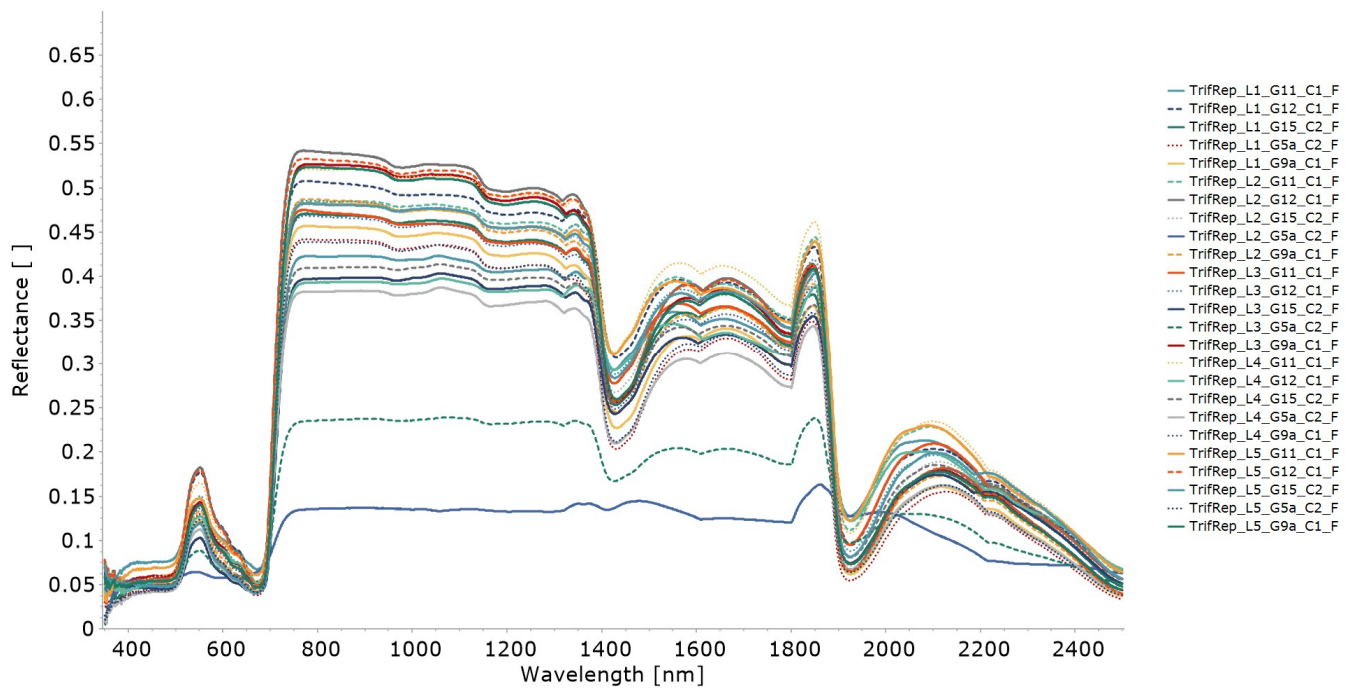

**Figure S2** – Individual spectral curves, covering the range 350 – 2500 nm, collected per leaf and leaf side in each species. Both sides of the leaves (ventral/front (F) side and dorsal/back (B) side) were considered for *Alnus glutinosa* (L.) Gaertn (AlnGlu), *Arbutus unedo* L. (ArbUne), *Castanea sativa* Mill. (CatSat), *Cistus ladanifer* L. (CistLad), *Crataegus monogyna* Jacq. (CratMon), *Frangula alnus* Mill. (FranAln), *Fraxinus angustifolia* Vahl (FraxAng), *Quercus pyrenaica* Willd. (QuerPyr), *Quercus rotundifolia* Lam. (QuerRot), and *Trifolium repens* L. (TrifRep), while a single side of the leaves was considered for *Acacia dealbata* Link. (AcaDea), *Cytisus multiflorus* (L'Hér.) Sweet (CytMult), *Dactylis glomerata* L. (DactGlo), *Erica arborea* L. (EriArb), and *Genista falcata* Brot. (GenFal).

**Table S1** - Coordinates (WGS 84) of the centre of the square grids sampled at Montesinho National Park

| Square grid<br>(1Km x 1Km) | Latitude             | Longitude            |
|----------------------------|----------------------|----------------------|
| G5a                        | 41.93954957599999744 | -7.10404515300000039 |
| G6                         | 41.926278599516003   | -7.08266121152174044 |
| G9a                        | 41.88351678800000144 | -6.692830324         |
| G11                        | 41.8736033369999987  | -6.75202131300000019 |
| G12                        | 41.86375226799999894 | -6.73226952599999962 |
| G15                        | 41.86534228400000046 | -7.11887240400000021 |
