# Supplementary material
Source: MDPI journal article supplement (https://www.mdpi.com/2306-5729/9/5/65)
Supplement: s1 [file s1]

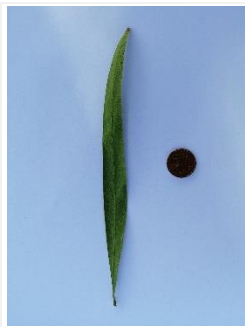

*Acacia dealbata* Link. \*

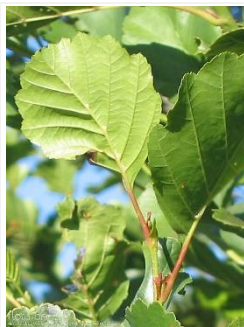

*Alnus glutinosa* (L.)  
Gaertn. \*\*

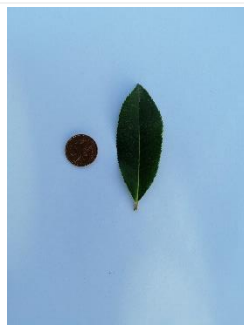

*Arbutus unedo* L. \*

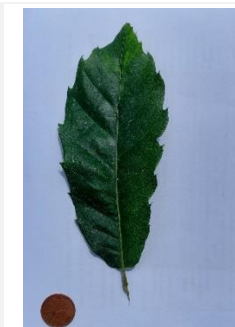

*Castanea sativa* Mill. \*

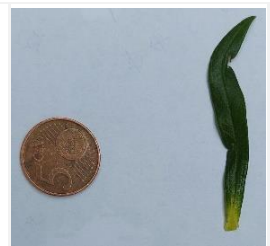

*Cistus ladanifer* L. \*

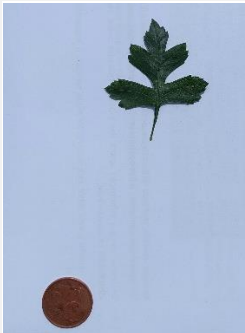

*Crataegus monogyna*  
Jacq. \*

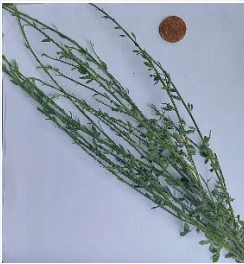

*Cytisus multiflorus*  
(L'Hér.) Sweet \*

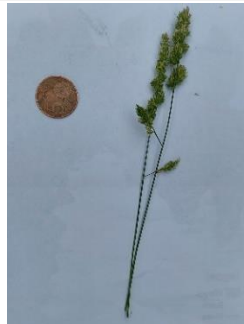

*Dactylis glomerata* L. \*

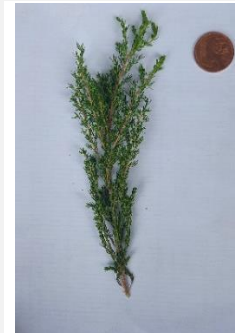

*Erica arborea* L. \*

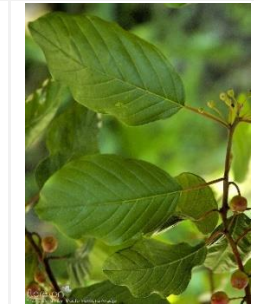

*Frangula alnus* Mill.  
\*\*\*

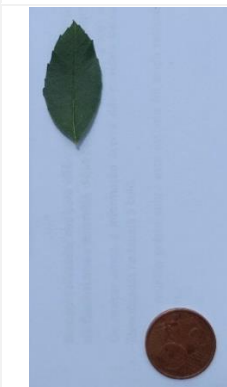

*Fraxinus angustifolia*  
Vahl \*

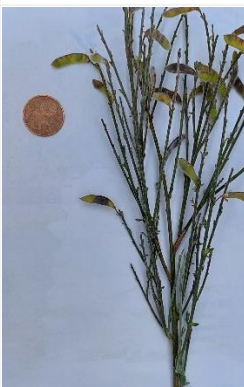

*Genista falcata* Brot. \*

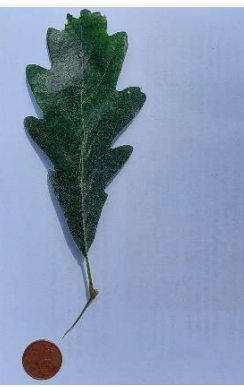

*Quercus pyrenaica*  
Willd. \*

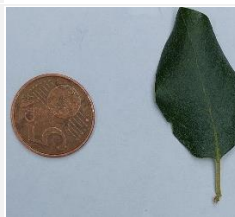

*Quercus rotundifolia*  
Lam. \*

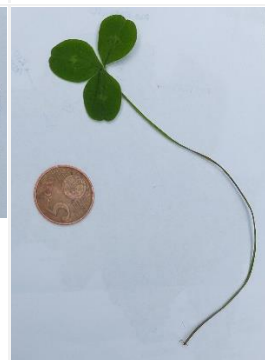

*Trifolium repens* L. \*

\* Photo credits: Campos, J. C. (2024). \*\* Almeida, J. D. (n.d.). Flora-On. License: CC BY-NC 4.0. \*\*\* Araújo, P. V. (n.d.).  
Flora-On. License: CC BY-NC 4.0.
